# Supplementary material for: Electrochemical Evaluation of Cd, Cu, and Fe in Different Brands of Craft Beers from Quito, Ecuador
Source: MDPI journal article supplement (doi:10.3390/foods12112264), 2023-06-04
Supplement: s1 [file s1]

## Soportes

### Tables

**Table S-1.** Cyclic voltammetry of  $K_4[Fe(CN)_6]$  /  $K_3[Fe(CN)_6]$  on BDD electrode.

| $\nu$<br>( $V\ s^{-1}$ ) | $\Delta E_p$<br>(mV) | $E_{p1/2}$<br>(mV) | $I_{p_{ox}}$<br>( $\mu A$ ) | $I_{p_{red}}$<br>( $\mu A$ ) | $I_{p_{ox}}/I_{p_{red}}$ | $k^o$<br>( $cm\ s^{-1}$ )                     |
|--------------------------|----------------------|--------------------|-----------------------------|------------------------------|--------------------------|-----------------------------------------------|
| 0.020                    | 74.78                | 372.90             | 193.2412                    | 195.8914                     | 0.99                     | $3.25 \times 10^{-02}$                        |
| 0.040                    | 87.86                | 372.77             | 275.0711                    | 278.4573                     | 0.99                     | $2.70 \times 10^{-02}$                        |
| 0.060                    | 96.10                | 371.78             | 335.5251                    | 339.4322                     | 0.99                     | $2.41 \times 10^{-02}$                        |
| 0.080                    | 101.09               | 371.84             | 385.0713                    | 388.0118                     | 0.99                     | $2.20 \times 10^{-02}$                        |
| 0.100                    | 107.50               | 371.63             | 430.0244                    | 432.3939                     | 0.99                     | $2.09 \times 10^{-02}$                        |
| 0.120                    | 113.04               | 372.27             | 468.9341                    | 471.5781                     | 0.99                     | $2.01 \times 10^{-02}$                        |
| Average                  |                      |                    |                             |                              |                          | $2.44 \times 10^{-2} \pm 4.67 \times 10^{-3}$ |

### Figures

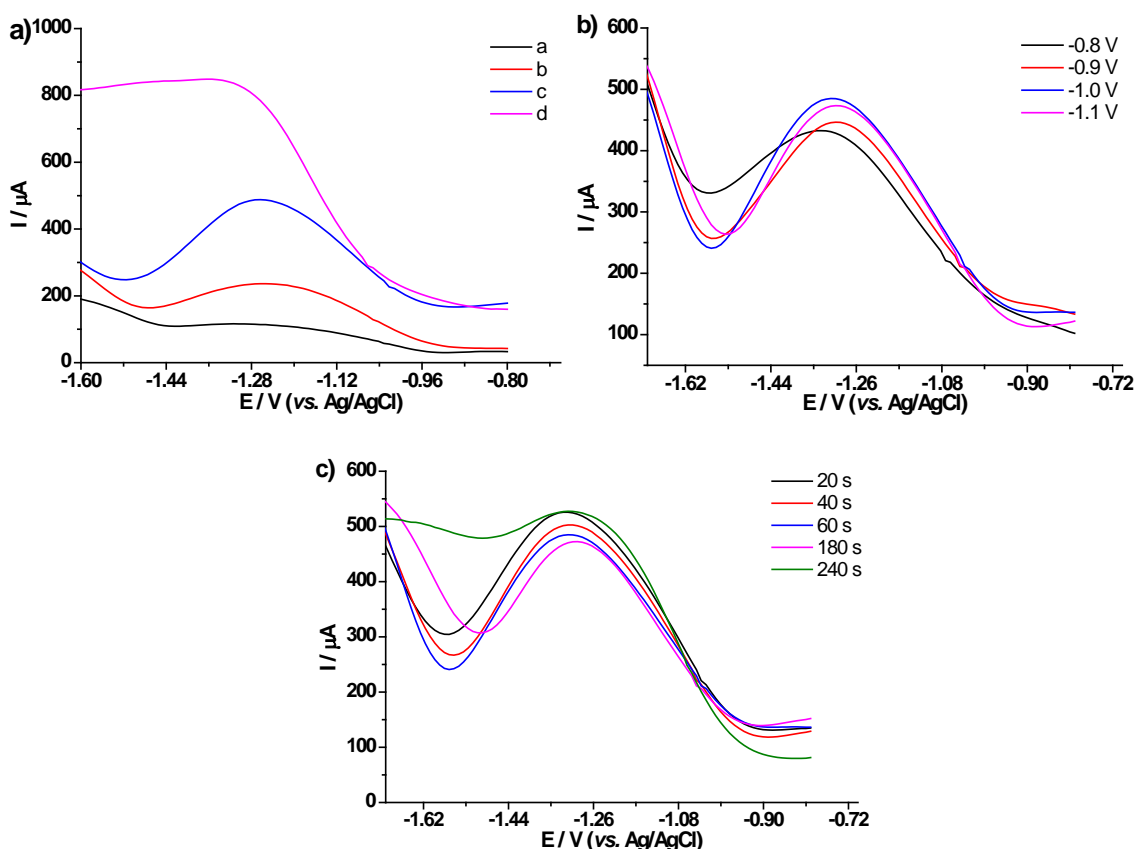

**Figure S-1.** Dissolution behavior of  $90\ \mu g\ L^{-1}$  of  $Cu(II)$  in electrolyte  $KNO_3\ 0.1\ mol\ L^{-1}$  /  $HNO_3\ 0.1\ mol\ L^{-1}$  by DPASV at different parameters: **(a)** from MA 0.05 V, MT 0.05 s, TI 0.05 s - MA 0.3 V, MT 0.3 s, TI 0.3 s. **(b)** from -0.8 V to -1.1 V. **(c)** from 20 s to 240 s.

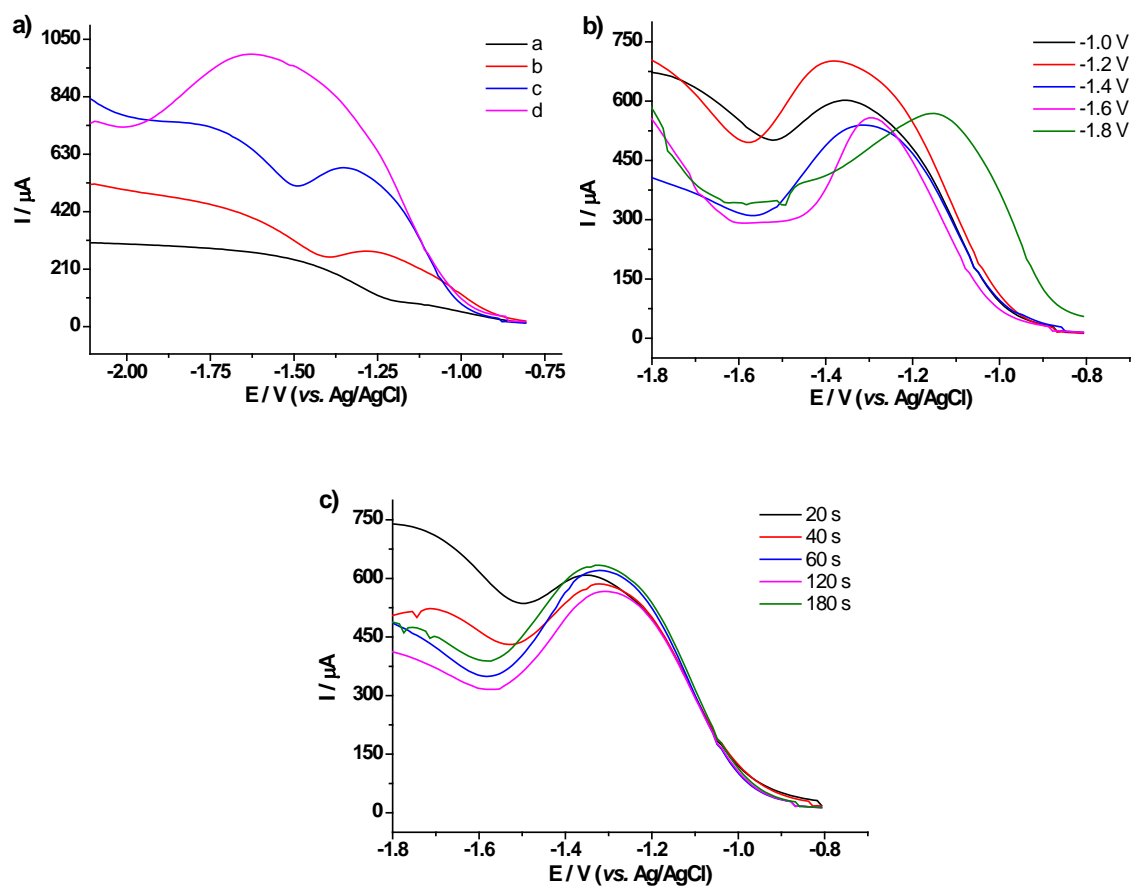

**Figure S-2.** Dissolution behavior of 80  $\mu\text{g L}^{-1}$  of Fe(III) in  $\text{KNO}_3$  0.1 mol  $\text{L}^{-1}$  /  $\text{HNO}_3$  0.01 mol  $\text{L}^{-1}$  electrolyte at different DPASV parameters: (a) from MA 0.05 V, MT 0.05 s, TI 0.05 s - MA 0.3 V, MT 0.3 s, TI 0.3 s. (b) from -1.0 V to -1.8 V. (c) from 20 s to 180 s.

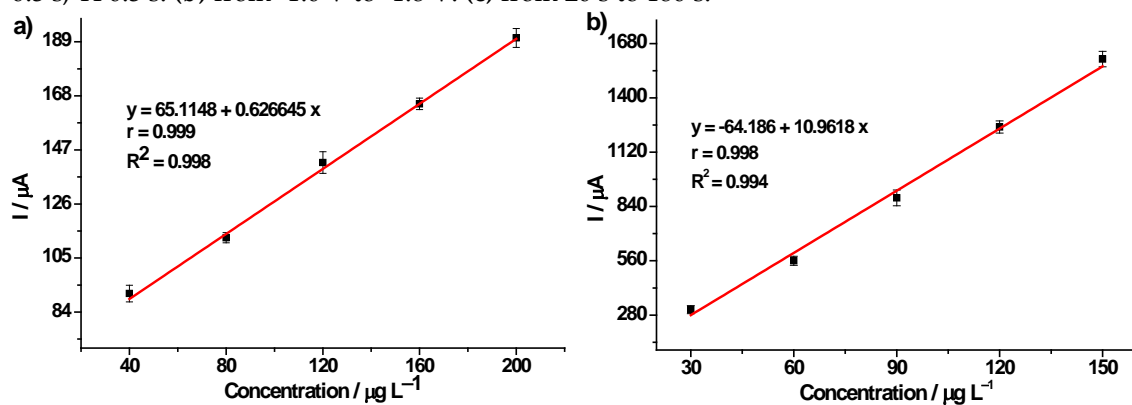

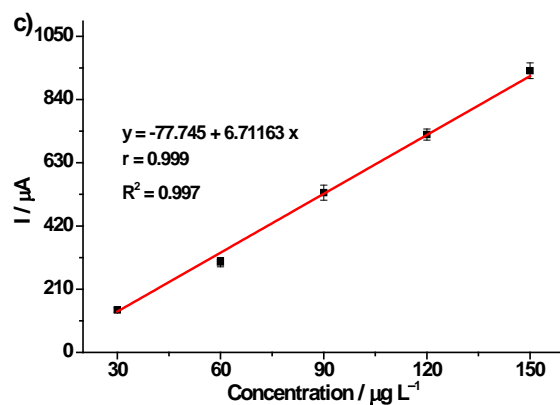

Figure S-3. Calibration plots of: (a) Cd(II); (b) Cu(II); (c) Fe(III).

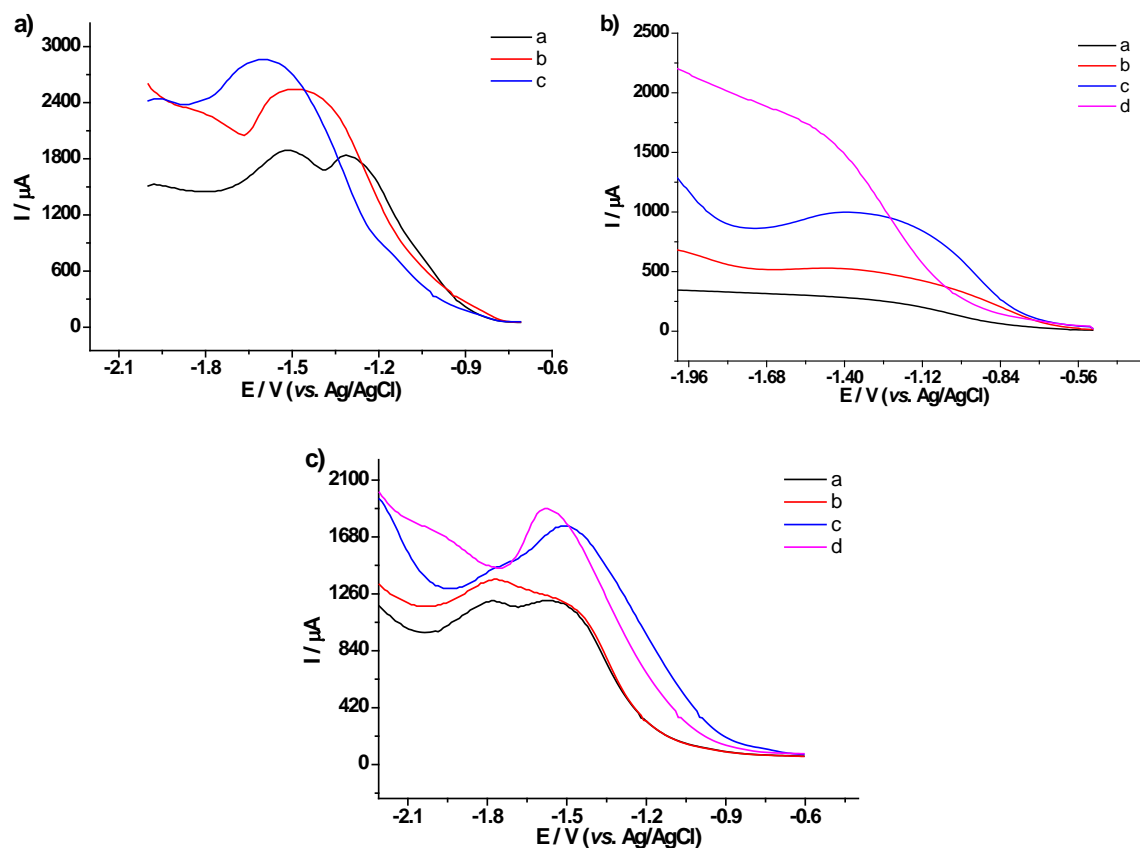

**Figure S-4.** Beer matrix dissolution behavior with metal standard: (a) 200  $\mu\text{g L}^{-1}$  standard of Cd(II) in 0.1 mol  $\text{L}^{-1}$  acetic acid electrolyte / sodium acetate at pH 4.5, by DPASV at different parameters: a) MA 0.5 V, MT 0.5 s, TI 0.5 s; b) MA 0.6 V, MT 0.6 s, TI 0.6 s; c) MA 0.7 V, MT 0.7 s, TI 0.7 s. (b) standard of 90  $\mu\text{g L}^{-1}$  of Cu(II) in electrolyte  $\text{KNO}_3$  0.1 mol  $\text{L}^{-1}$  /  $\text{HNO}_3$  0.1 mol  $\text{L}^{-1}$  by DPASV at different parameters: a) MA 0.5 V, MT 0.5 s, TI 0.5 s; b) MA 0.6 V, MT 0.6 s, TI 0.6 s; c) MA 0.7 V, MT 0.7 s, TI 0.7 s; d) MA 0.8 V, MT 0.8 s, TI 0.8 s. (c) 80  $\mu\text{g L}^{-1}$  Fe(III) standard in 0.1 mol  $\text{L}^{-1}$   $\text{KNO}_3$  / 0.01 mol  $\text{L}^{-1}$   $\text{HNO}_3$  electrolyte at different DPASV parameters: a) MA 0.4 V, MT 0.4s, TI 0.4s; b) MA 0.5 V, MT 0.5 s, TI 0.5 s; c) MA 0.6 V, MT 0.6 s, TI 0.6 s; d) MA 0.7 V, MT 0.7 s, TI 0.7 s.

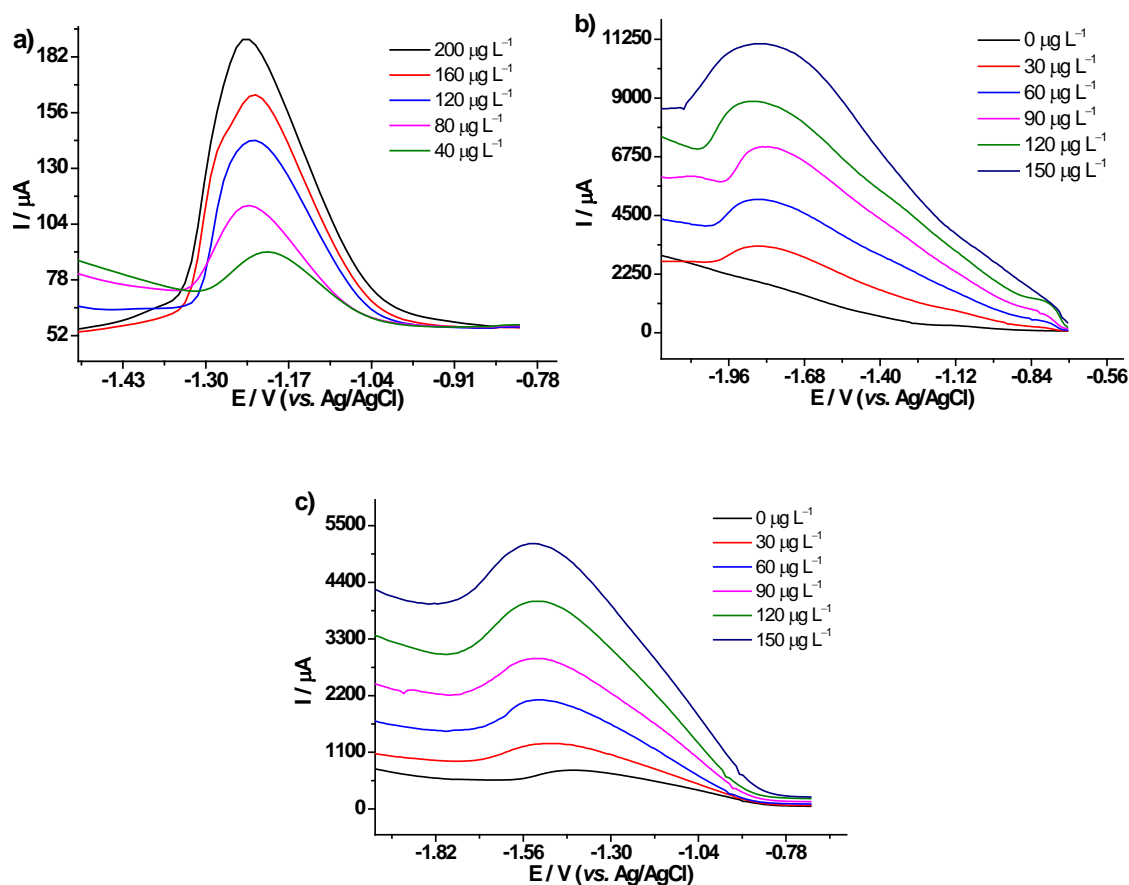

Figure S-5. Voltammogram and standard addition curve by DPASV in craft beer at different concentrations: (a) Cd(II); (b) Cu(II); (c) Fe(III).

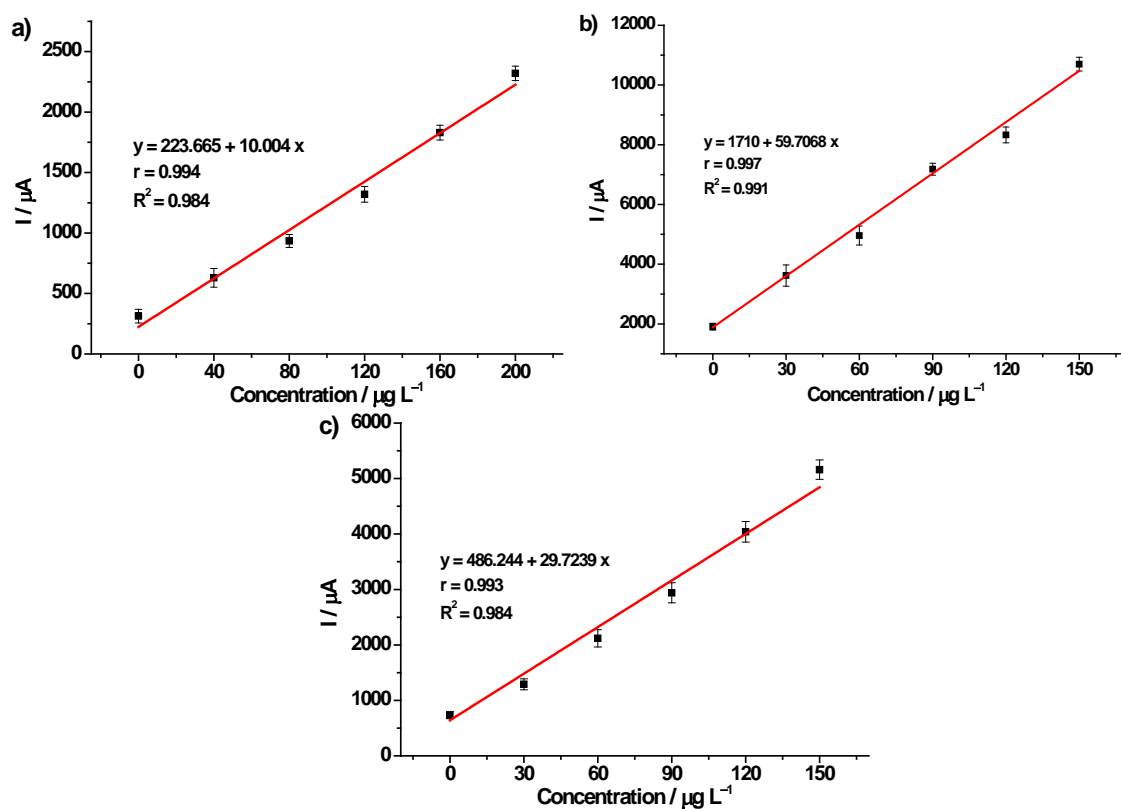

Figure S-6. Standard improvement calibration curves: (a) for Cd(II), (b) for Cu(II) and (c) for Fe(III).
